# Supplementary material for: Sharing refuges on arid islands: ecological and social influence on aggregation behaviour of wall geckos
Source: PeerJ. 2017 Jan 10;5:e2802. doi: 10.7717/peerj.2802 (PMC5228510; doi:10.7717/peerj.2802)
Supplement: Data S1 — Details for quadrats (per gecko and per station) and for transects. [file peerj-05-2802-s003.xlsx]

## Sheet: quadrats_geckos
GECKO	STATION	HAB	AGE	MASS	SVL	ROCK	SEX	COUPLES	NOTES
67	SV19	Arid and hilly	adult	6	54	P	F
68	SV19	Arid and hilly	adult	6	54	M	F
69	SV19	Arid and hilly	adult	8	59	M	M	casal 15
70	SV19	Arid and hilly	adult	6	57	M	F	casal 15
71	SV19	Arid and hilly	adult	7	54	M	M	casal 16	perdeu cauda
72	SV19	Arid and hilly	adult	4	48	M	F	casal 16
78	SV23	Arid and mountain	adult	6.5	52	M	F
104	SV35	Arid and mountain	adult	7	56	M	M	casal 19
105	SV35	Arid and mountain	adult	8	60	M	M
73	SV21	Arid and mountain	juvenile	2	28	M	unk
74	SV21	Arid and mountain	juvenile	2	27	P	unk
103	SV35	Arid and mountain	juvenile	4	44	M	unk	casal 19
106	SV38	Very arid and flat	adult	7.5	54	G	F
108	SV38	Very arid and flat	adult	6	56	M	F
107	SV38	Very arid and flat	juvenile	1.5	28	M	unk
76	SV22	Semi-arid and mountain	adult	6	52	M	M
77	SV22	Semi-arid and mountain	adult	5.5	49	M	M
79	SV24	Semi-arid and mountain	adult	6	49	M	F
80	SV24	Semi-arid and mountain	adult	6	54	P	F		6 lagartixas vistas
100	SV34	Semi-arid and mountain	adult	4.5	48	G	F	casal18	casal com seguinte
101	SV34	Semi-arid and mountain	adult	7	56	M	M	casal 18	20 cm ao lado!
75	SV22	Semi-arid and mountain	juvenile	2	27	P	unk
102	SV34	Semi-arid and mountain	juvenile	1.5	25	P	unk
16	SV07	Very arid and flat	adult	4.5	46	M	F
17	SV07	Very arid and flat	adult	7	54	M	M
18	SV07	Very arid and flat	adult	5	46	P	M
19	SV08	Very arid and flat	adult	4	45	M	M
86	SV30	Very arid and flat	adult	5.5	54	P	F	casal 17 + juv
87	SV30	Very arid and flat	adult	7	58	P	M	casal 17 + juv
15	SV07	Very arid and flat	juvenile	1.5	26	P	unk
85	SV30	Very arid and flat	juvenile	3	39	P	unk
88	SV30	Very arid and flat	juvenile	2	25	P	unk	casal 17 + juv	junto com casal mesma pedra
89	SV30	Very arid and flat	juvenile	1.5	26	P	unk	casal 17 + juv?	rocha ao lado de casal
90	SV30	Very arid and flat	juvenile	2	26	P	unk
91	SV30	Very arid and flat	juvenile	3	38	P	unk
92	SV30	Very arid and flat	juvenile	2	30	P	unk
96	SV32	Very arid and flat	juvenile	2	26	pyle	unk
97	SV32	Very arid and flat	juvenile	1.5	24	pyle	unk
10	SV03	Very arid and hilly	adult	5	48	M	M
24	SV12	Very arid and hilly	adult	7.5	59	crevice/pyle	F	casal 01
25	SV12	Very arid and hilly	adult	7	55	crevice/pyle	M	casal 01
26	SV12	Very arid and hilly	adult	8	57	pyle	F	casal 02
27	SV12	Very arid and hilly	adult	5.5	50	pyle	M	casal 02
28	SV12	Very arid and hilly	adult	4.5	48	pyle	F	casal 03
29	SV12	Very arid and hilly	adult	5	50	pyle	M	casal 03
30	SV12	Very arid and hilly	adult	5	50	pyle	M
32	SV12	Very arid and hilly	adult	8	60	pyle	M
33	SV13	Very arid and hilly	adult	7.5	56	M	M	casal 04
34	SV13	Very arid and hilly	adult	6.5	55	M	F	casal 04
35	SV13	Very arid and hilly	adult	7	57	M	M	casal 05
36	SV13	Very arid and hilly	adult	5	49	M	F	casal 05
37	SV13	Very arid and hilly	adult	5	51	M	F	casal 06
38	SV13	Very arid and hilly	adult	7.5	61	M	M	casal 06
41	SV13	Very arid and hilly	adult	8	60	M	M	casal 07
42	SV13	Very arid and hilly	adult	6.5	55	M	F	casal 07
43	SV13	Very arid and hilly	adult	5	49	G	F
44	SV13	Very arid and hilly	adult	5	48	M	M
45	SV13	Very arid and hilly	adult	5	50	M	F	casal 08	casal com T52
46	SV13	Very arid and hilly	adult	4.5	49	M	F	casal 09
47	SV13	Very arid and hilly	adult	6.5	54	M	M	casal 09
48	SV13	Very arid and hilly	adult	6	54	M	M	casal 10
49	SV13	Very arid and hilly	adult	5.5	51	M	F	casal 10
50	SV13	Very arid and hilly	adult	6.5	56	M	M	casal 11
51	SV13	Very arid and hilly	adult	4.5	49	M	F	casal 11
52	SV13	Very arid and hilly	adult	7	56	M	M	casal 08	casal com t45
53	SV13	Very arid and hilly	adult	5.5	49	M	M
54	SV14	Very arid and hilly	adult	7	57	M	M
60	SV18	Very arid and hilly	adult	8	57	M	M
61	SV18	Very arid and hilly	adult	7.5	57	M	M
62	SV18	Very arid and hilly	adult	4	46	G	F
63	SV18	Very arid and hilly	adult	7.5	56	M	M	casal 13
64	SV18	Very arid and hilly	adult	5	51	M	F	casal 13
65	SV18	Very arid and hilly	adult	5	50	M	F	casal 14
66	SV18	Very arid and hilly	adult	6	54	M	M	casal 14	perdeu cauda
98	SV33	Very arid and hilly	adult	5	47	M	M
21	SV11	Very arid and hilly	juvenile	2	27	M	unk
22	SV11	Very arid and hilly	juvenile	2	29	M	unk
23	SV11	Very arid and hilly	juvenile	1.5	27	P	unk
31	SV12	Very arid and hilly	juvenile	2	28	pyle	unk
39	SV13	Very arid and hilly	juvenile	2	28	P	unk
40	SV13	Very arid and hilly	juvenile	2	28	P	unk
59	SV18	Very arid and hilly	juvenile	2	28	P	unk
84	SV29	Very arid and hilly	juvenile	1.5	27	M	unk
93	SV31	Very arid and hilly	juvenile	2	25	P	unk
94	SV31	Very arid and hilly	juvenile	2	27	P	unk
95	SV31	Very arid and hilly	juvenile	2	27	P	unk
99	SV33	Very arid and hilly	juvenile	2	29	P	unk
5	SV02	Very arid and mountain	adult	7	54	M	M	casal 00
6	SV02	Very arid and mountain	adult	4.5	47	M	M
8	SV02	Very arid and mountain	adult	5.5	48	M	F	casal 00	perdeu cauda
9	SV02	Very arid and mountain	adult	4	46	M	F
20	SV10	Very arid and mountain	adult	5.5	53	M	M
55	SV16	Very arid and mountain	adult	5	52	M	F	casal 12
56	SV16	Very arid and mountain	adult	7.5	59	M	M	casal 12
81	SV26	Very arid and mountain	adult	4.5	46	M	F
83	SV28	Very arid and mountain	adult	6.5	53	M	M
109	SV39	Very arid and mountain	adult	5.5	51	P	F
111	SV39	Very arid and mountain	adult	5	52	P	F
112	SV39	Very arid and mountain	adult	5.5	51	P	M
3	SV01	Very arid and mountain	juvenile	3	40	crevice/P	unk
4	SV02	Very arid and mountain	juvenile	1	25	P	unk
7	SV02	Very arid and mountain	juvenile	1.5	27	P	unk
57	SV16	Very arid and mountain	juvenile	2	25	P	unk
58	SV16	Very arid and mountain	juvenile	2	28	P	unk
82	SV26	Very arid and mountain	juvenile	2	26	P	unk
110	SV39	Very arid and mountain	juvenile	1.5	27	P	unk
12	SV06	Water lines and floodplains	adult	5.5	49	M	F
13	SV06	Water lines and floodplains	adult	4	50	M	F
11	SV06	Water lines and floodplains	juvenile	2		P	?		just seen
14	SV06	Water lines and floodplains	juvenile	2	28	M	unk

## Sheet: quadrats_stations
STATION	Y	X	HABITAT	Altitude	SMALL ROCKS COVER	MEDIUM ROCKS	BIG ROCKS	ABUNDANCE	M rock/ind	B rock/ind	Nr Males	Nr Females	NrAdults	Nr Juveniles + subadults	SUM individuals	Nr of couples	NOTES
SV01	16.9033	-24.9963	Very arid and mountain	28	25-50	8	0	1	8	0			0	1	1	0
SV02	16.8893	-24.9646	Very arid and mountain	76	75-100	35	5	6	5.83333	0.833333	2	2	4	2	6	1
SV03	16.8808	-24.9658	Very arid and hilly	73	0-25	30	5	1	30	5	1		1		1	0
SV04	16.8995	-24.9195	Very arid and flat	8	0-25	7	2	0					0		0	0			Very arid and mountain	#REF!	#REF!	#REF!
SV05	16.9103	-24.9358	Very arid and flat	4	0-25	23	3	0					0		0	0	1 Chioninia presence (esqueleto)		Water lines and floodplains	#REF!	#REF!	#REF!
SV06	16.902	-24.9392	Water lines and floodplains	23	25-50	20	2	4	5	0.5		2	2	2	4	0
SV07	16.8225	-24.8937	Very arid and flat	96	75-100	29	0	4	7.25	0	2	1	3	1	4	0
SV08	16.8278	-24.8962	Very arid and flat	88	25-50	7	0	1	7	0	1		1		1	0
SV09	16.8345	-24.9003	Very arid and mountain	149	0-25	25	2	0					0		0	0
SV10	16.8282	-24.9348	Very arid and mountain	119	25-50	4	1	1	4	1	1		1		1	0
SV11	16.8348	-24.9501	Very arid and hilly	128	25-50	27	2	3	9	0.666667			0	3	3	0
SV12	16.8525	-24.9723	Very arid and hilly	48	25-50	10	0	9	1.11111	0	5	3	8	1	9	3
SV13	16.8619	-24.9813	Very arid and hilly	41	25-50	35	3	21	1.66667	0.142857	10	9	19	2	21	8
SV14	16.8226	-24.9848	Very arid and hilly	180	25-50	48	1	1	48	1	1		1		1	0
SV15	16.8394	-24.9792	Very arid and flat	63	25-50	2	0	0					0		0	0
SV16	16.838	-25.0683	Very arid and mountain	51	25-50	5	1	4	1.25	0.25	1	1	2	2	4	1
SV17	16.8289	-25.0572	Very arid and flat	6	0-25	0	0	0					0		0	0
SV18	16.842	-25.0379	Very arid and hilly	68	25-50	17	1	8	2.125	0.125	4	3	7	1	8	2
SV19	16.8706	-24.9417	Arid and hilly	318	75-100	16	3	6	2.66667	0.5	2	4	6		6	2
SV20	16.8696	-24.9343	Sub-humid and mountain	564	0-25	3	2	0					0		0	0			Sub-humid and mountain	#REF!	#REF!	#REF!
SV21	16.8828	-24.9408	Arid and mountain	125	25-50	8	0	2	4	0			0	2	2	0
SV22	16.8809	-24.9246	Semi-arid and mountain	291	50-75	40	6	3	13.3333	2	2		2	1	3	0			Dunes	#REF!	#REF!	#REF!
SV23	16.8791	-24.9165	Arid and mountain	73	50-75	8	2	1	8	2		1	1		1	0			Arid and hilly	#REF!	#REF!	#REF!
SV24	16.8676	-24.9008	Semi-arid and mountain	67	50-75	30	5	2	15	2.5		2	2		2	0	6 Chioninia present
SV25	16.8542	-24.8654	Very arid and flat	7	0-25	3	0	0					0		0	0
SV26	16.8089	-25.044	Very arid and mountain	25	75-100	14	3	2	7	1.5		1	1	1	2	0
SV27	16.8221	-25.0341	Very arid and flat	36	25-50	2	0	1					0	0	0	0	?egg
SV28	16.8292	-25.0284	Very arid and mountain	54	75-100	14	3	1	14	3	1		1		1	0
SV29	16.8324	-25.0181	Very arid and hilly	81	0-25	1	0	1	1	0			0	1	1	0
SV30	16.8548	-25.0018	Very arid and flat	28	0-25	1	0	8	0.125	0	1	1	2	6	8	1
SV31	16.8661	-24.9958	Very arid and hilly	38	25-50	5	0	3	1.66667	0			0	3	3	0
SV32	16.8749	-25.0234	Very arid and flat	35	0-25	1	0	2	0.5	0			0	2	2	0
SV33	16.8741	-25.0306	Very arid and hilly	96	25-50	7	1	2	3.5	0.5	1		1	1	2	0
SV34	16.8602	-24.9306	Semi-arid and mountain	398	0-25	7	1	3	2.33333	0.333333	1	1	2	1	3	1			Semi-arid and mountain	#REF!	#REF!	#REF!
SV35	16.8505	-24.9272	Arid and mountain	156	75-100	4	0	3	1.33333	0	2		2	1	3	1
SV36	16.8555	-24.9411	Very arid and hilly	233	50-75	5	6	0					0		0	0
SV37	16.8592	-24.9467	Arid and hilly	189	50-75	14	0	0					0		0	0
SV38	16.8437	-25.0336	Very arid and flat	63	0-25	15	1	3	5	0.333333		2	2	1	3	0			Arid and mountain	#REF!	#REF!	#REF!
SV39	16.8596	-25.0329	Very arid and mountain	97	25-50	5	0	4	1.25	0	1	2	3	1	4	0
SV40	16.8476	-24.96	Very arid and hilly	134	75-100	2	0	0					0		0	0

## Sheet: transects
CODE	HOUR	ACTIVITY	ROCK SIZE	ROCK Nr	BUSHES	T(SOIL)	T(ROCK)	T(AIR)	T(BODY)	SIZE	AGE	SEX	PHOTO	COUPLES	Refuge sharing	NOTES
47	16:22:00	inactive	medium	pyle	no	30.7	31.4	28.4	30.9	53	adult	M	yes	agonistic interaction	shared
48	16:22:00	inactive	medium	pyle	no	30.7	31.4	28.4	30.2	50	adult	M	yes	agonistic interaction	shared
7	10:03:00	inactive	medium	pyle	no	29.6	28.1	29.6	32.6	51	adult	M	yes	casal 01	shared
8	10:03:00	inactive	medium	pyle	no	29.6	28.1	29.6	32.1	48	adult	F	yes	casal 01	shared
11	10:21:00	inactive	medium	pyle	no	26.4	26.7	30.9	30.1	52	adult	F	yes	casal 02	shared
12	10:21:00	inactive	medium	pyle	no	26.4	26.7	30.9	30.9	50	adult	M	yes	casal 02	shared
17	11:20:00	inactive	small	pyle	yes	33.9	34.5	33.5	32.2	49	adult	M	yes	casal 03	shared
18	11:20:00	inactive	small	pyle	yes	33.9	34.5	33.5	31.6	50	adult	F	yes	casal 03	shared
20	12:09:00	inactive	small	pyle	yes	37.4	38.9	34.3	32.6	43	juvenile	F	yes	casal 04 + juv	shared	na rocha
21	12:09:00	inactive	small	pyle	no	31.6	36	33.2	40.3	50	adult	F	yes	casal 04 + juv	shared
22	12:09:00	inactive	small	pyle	no	31.6	36	33.2	37.8	49	adult	M	yes	casal 04 + juv	shared
35	14:39:00	inactive	medium	pyle	no	30.8	32.1	30.6	34.5	53	adult	M	yes	casal 05	shared
36	14:39:00	inactive	medium	pyle	no	30.8	32.1	30.6	31.1	54	adult	F	yes	casal 05	shared
37	14:50:00	inactive	large	2	no	29.8	31.2	30.8	31.9	49	adult	M	yes	casal 06	shared
38	14:50:00	inactive	large	pyle	no	29.8	31.2	30.8	30.8	47	adult	F	yes	casal 06	shared
40	15:27:00	inactive	medium	1	no	34.8	39.4	30.1	38	52	adult	M	yes	casal 07 + juv	shared
41	15:27:00	inactive	medium	1	no	34.8	39.4	30.1	36.3	54	adult	F	yes	casal 07 + juv	shared
42	15:27:00	inactive	medium	1	no	34.8	39.4	30.1	33.3	32	juvenile	UNK	yes	casal 07 + juv	shared
52	17:16:00	inactive	large	1	no	28.3	34.6	26.5	30.9	52	adult	M	yes	casal 08	shared
53	17:16:00	inactive	large	1	no	28.3	34.6	26.5	29.7	51	adult	F	yes	casal 08	shared
57	17:45:00	inactive	large	pyle	no	30.8	33.8	32.8	30.1	48	adult	F	yes	casal 09	shared
58	17:45:00	inactive	large	pyle	no	30.8	33.8	32.8	32.3	50	adult	M	yes	casal 09	shared	fugiu
61	18:27:00	inactive	large	pyle	no	26.3	29.6	25.2	27.3	57	adult	M	yes	casal 10	shared
62	18:36:00	inactive	large	pyle	no	26.3	29.6	25.2	27.6	65	adult	F	yes	casal 10	shared
84	23:03:00	inactive	medium	pyle	yes	25.9	25.2	23.6	25.5	55	adult	F	yes	casal 11	shared
85	23:03:00	inactive	medium	pyle	yes	25.9	25.2	23.6	24.3	57	adult	M	yes	casal 11	shared
104	15:19:00	inactive	small	pyle	no	37.9	40.4	29.6	38.7	55	adult	M	yes	casal 12	shared
105	15:20:00	inactive	small	pyle	no	37.9	40.4	29.6	41	49	adult	F	yes	casal 12	shared
106	15:25:00	inactive	large	pyle	yes	41.8	45.7	31.8	43.2	39	adult	M	yes	casal 13	shared
107	15:25:00	inactive	large	pyle	yes	41.8	45.7	29.4	39.4	38	adult	F	yes	casal 13	shared
108	15:32:00	inactive	large	pyle	yes	34.6	38.4	29.7	38.2	50	adult	M	yes	casal 14	shared	muda de pele
109	15:32:00	inactive	large	pyle	yes	36.7	43	29.7	37	42	adult	F	yes	casal 14	shared
112	16:02:00	inactive	medium	2	yes	37.3	37.9	29	36.7	51	adult	M	yes	casal 15	shared
113	16:02:00	inactive	medium	2	yes	37.3	37.9	29	38.9	54	adult	F	yes	casal 15	shared
114	16:10:00	inactive	medium	1	no	33.8	39.3	29	35.8	50	adult	M	yes	casal 16	shared
115	16:10:00	inactive	medium	1	no	33.8	39.3	29	36.7	51	adult	F	yes	casal 16	shared
125	18:33:00	inactive	small	pyle	no	28.3	27.8	26.3	27.8	40	adult	F	yes	casal 17	shared
126	18:33:00	inactive	small	pyle	no	28.3	27.8	26.3	27.8	47	adult	F	yes	casal 17	shared
129	18:49:00	inactive	medium	pyle	no	27.2	28.6	24.9	28.1	50	adult	F	yes	casal 18	shared
130	18:49:00	inactive	medium	pyle	no	27.2	28.6	24.9	28.3	60	adult	M	yes	casal 18	shared
136	19:38:00	inactive	medium	1	no	29.1	30.8	24.7	28.1	53	adult	M	yes	casal 19	shared
137	19:38:00	inactive	medium	1	no	29.1	30.8	24.7	30.1	51	adult	F	yes	casal 19	shared
158	06:27:00	inactive	medium	2	no	24.8	22.1	22.6	21.8	51	adult	F	yes	casal 20	shared
159	06:27:00	inactive	medium	2	no	24.8	22.1	22.6	22.7	57	adult	M	yes	casal 20	shared
160	06:40:00	inactive	medium	1	no	22.9	20.7	18.2	22.1	48	adult	M	yes	casal 21	shared
161	06:40:00	inactive	medium	1	no	22.9	20.7	18.2	21.4	46	adult	F	yes	casal 21	shared
171	08:41:00	inactive	medium	2	no	24.7	24.4	27.6	24.2	55	adult	F	yes	casal 22	shared
172	08:46:00	inactive	medium	2	no	24.7	24.4	27.6	23.8	54	adult	M	yes	casal 22	shared
210	06:31:00	inactive	medium	3	yes	23	23.1	23.6	24.9	55	adult	M	yes	casal 23	shared
211	06:31:00	inactive	medium	3	yes	23	23.1	23.6	23.5	51	adult	F	yes	casal 23	shared
215	07:19:00	inactive	medium	2	yes	25.6	25.1	23.8	23.6	47	adult	M	yes	casal 24	shared
216	07:19:00	inactive	medium	2	yes	25.6	25.1	23.8	24.6	50	adult	F	yes	casal 24	shared
227	09:21:00	inactive	medium	2	no	27.7	29.2	28.2	27.1	49	adult	M	yes	casal 25	shared
228	09:26:00	inactive	medium	2	no	27.7	29.2	28.2	27.2	50	adult	F	yes	casal 25	shared
240	11:09:00	inactive	medium	1	no	28.6	32.3	29.3	29.9	51	adult	M	yes	casal 26	shared
241	11:09:00	inactive	medium	1	no	28.6	32.3	29.3	29.7	50	adult	F	yes	casal 26	shared
247	12:24:00	inactive	medium	3	no	30.9	32.2	31.2	31.5	51	adult	M	yes	casal 27	shared
248	12:29:00	inactive	medium	3	no	30.9	32.2	31.2	31.2	54	adult	F	yes	casal 27	shared
253	13:16:00	inactive	medium	pyle	no	27.3	30.5	32.7	34.3	55	adult	F	yes	casal 28	shared
254	13:16:00	inactive	medium	pyle	no	27.3	30.5	32.7	34.6	60	adult	M	yes	casal 28	shared
258	14:31:00	inactive	medium	1	no	35.1	37.3	32.6	35.2	58	adult	M	yes	casal 29	shared
259	14:32:00	inactive	medium	1	no	35.1	37.3	32.6	34.5	49	adult	F	yes	casal 29	shared
182	00:30:00	inactive	medium	pyle	no	27.5	27.4	24.7	26.7	51	adult	F	yes		not shared
183	00:39:00	inactive	small	pyle	no	26.4	25.3	25.1	24.5	38	juvenile	UNK	yes		not shared
95	00:41:00	inactive	large	1	no	26.6	26.2	23.7	25.8	59	adult	M	yes		not shared	muda de pele
185	01:16:00	inactive	small	2	no	27.2	26.9	25.2	27.5	38	juvenile	UNK F	yes		not shared
186	01:27:00	inactive	small	pyle	no	26.6	25.8	25.9	24.7	49	adult	M	yes		not shared
187	01:39:00	inactive	small	pyle	no	27.1	24.8	25.6	25.4	58	adult	M	yes		not shared
188	01:45:00	inactive	small	pyle	no	25.9	24.4	25.4	27.2	53	adult	F	yes		not shared
191	02:33:00	inactive	medium	3	no	29.2	28.3	25.2	27.9	43	juvenile	M	yes		not shared
144	03:05:00	inactive	medium	1	no	26.9	25.9	25.6	23.3	51	adult	F	yes		not shared
192	03:19:00	inactive	small	4	no	23	22.6	24.9	22.6	53	adult	M	yes		not shared
155	05:31:00	inactive	small	1	no	23.6	23	23.1	22.8	43	juvenile	M	yes		not shared
157	06:09:00	inactive	small	4	no	24.1	23.8	22	23.5	44	juvenile	F	yes		not shared
209	06:21:00	inactive	medium	pyle	no	24.2	23	23.8	22.3	30	juvenile	UNK	yes		not shared
212	06:45:00	inactive	medium	3	no	24.3	24.1	23.5	24.7	57	adult	M	yes		not shared
213	07:06:00	inactive	medium	3	yes	24.5	23.4	23.7	23.4	46	adult	F	yes		not shared
162	07:07:00	inactive	medium	3	no	23.3	23	23.9	22.9	51	adult	M	yes		not shared
163	07:11:00	inactive	small	pyle	no	25	24.1	24	25	38	juvenile	M	yes		not shared
214	07:13:00	inactive	medium	1	no	24.4	24	23.3	23.4	54	adult	M	yes		not shared
164	07:30:00	inactive	medium	1	no	23.3	22	25.3	22.2	46	adult	F	yes		not shared
217	07:31:00	inactive	medium	2	no	24.4	24.4	24	23.9	47	adult	F	yes		not shared
218	07:39:00	inactive	small	1	no	24.3	23.4	23.5	23.7	38	juvenile	UNK F	yes		not shared
165	07:43:00	inactive	medium	pyle	no	22.9	21.2	24.3	22.4	42	juvenile	M	yes		not shared
219	07:44:00	inactive	small	1	no	24.1	23.6	23.6	23.4	42	juvenile	M	yes		not shared	muda de pele
220	08:04:00	inactive	small	3	no	23.8	24	24	23.8	42	juvenile	M	yes		not shared
166	08:05:00	inactive	medium	2	no	25	23.4	25.2	24.6	40	juvenile	F	yes		not shared
221	08:09:00	inactive	medium	1	no	25.2	24.1	24.1	24.7	52	adult	F	yes		not shared
167	08:14:00	inactive	small	pyle	no	24.6	23.6	26	24.3	49	adult	F	yes		not shared
222	08:16:00	inactive	medium	1	no	24.8	24.1	24.8	23.6	37	juvenile	F	yes		not shared	sem cauda
168	08:19:00	inactive	medium	pyle	no	24.2	23.2	26.3	23.1	43	juvenile	M	yes		not shared
223	08:26:00	inactive	small	pyle	no	24.8	23.7	24.8	24.2	41	juvenile	M	yes		not shared
169	08:29:00	inactive	small	pyle	no	23.9	25.8	26.3	23.7	36	juvenile	M	yes		not shared
224	08:34:00	inactive	small	1	no	24.1	23.5	25.1	23.7	35	juvenile	UNK F	yes		not shared
170	08:37:00	inactive	large	1	no	23.9	23.7	25.7	25.4	48	adult	F	yes		not shared
225	08:38:00	inactive	small	2	no	25.2	25.7	25.4	24.7	35	juvenile	UNK M	yes		not shared
226	08:45:00	inactive	medium	pyle	no	23.4	23.3	25.2	22.3	54	adult	F	yes		not shared
1	09:11:00	inactive	medium	3	no	25.8	26.3	26.8	27.1	44	juvenile	M	yes		not shared
2	09:19:00	inactive	medium	pyle	no	26.7	26.3	27.3	27.1	35	juvenile	F	yes		not shared
3	09:24:00	inactive	small	pyle	no	26.6	26.6	27.1	29.7	48	adult	F	yes		not shared
4	09:30:00	inactive	medium	pyle	no	28.3	30.3	28.5	30	52	adult	F	yes		not shared	entre rochas
229	09:33:00	inactive	medium	2	yes	27.6	27.5	28	27.3	56	adult	F	yes		not shared
5	09:39:00	inactive	small	pyle	no	26.6	26.6	28.9	34.4	41	juvenile	F	yes		not shared
230	09:40:00	inactive	medium	2	no	33.1	35.7	28.4	33.5	47	adult	F	yes		not shared
231	09:43:00	inactive	medium	2	no	31.8	38.2	28.4	35.5	49	adult	M	yes		not shared
6	09:45:00	inactive	small	pyle	no	27.6	26.3	28.9	26.7	37	juvenile	F	yes		not shared
232	09:58:00	inactive	medium	1	no	27.6	28.8	29.3	26.7	45	adult	F	yes		not shared
9	10:08:00	inactive	medium	pyle	no	31.6	27.9	29.8	32.2	31	juvenile	F	yes		not shared
233	10:12:00	inactive	small	pyle	no	29.7	33.2	30.4	32.4	41	juvenile	F	yes		not shared
234	10:16:00	inactive	medium	1	no	28.9	28.8	34	30.7	50	adult	M	yes		not shared
10	10:17:00	inactive	medium	pyle	no	29.6	26.9	30.7	32.6	47	adult	F	yes		not shared
235	10:24:00	inactive	medium	1	no	28.6	38.9	30.7	38.1	53	adult	F	yes		not shared
13	10:30:00	inactive	medium	pyle	no	26.4	26.7	30.9	27.3	41	juvenile	F	yes		not shared
236	10:32:00	inactive	medium	1	no	31.3	32.5	32.3	34.7	52	adult	F	yes		not shared	sem cauda
237	10:40:00	inactive	medium	pyle	no	28.9	28.9	31	30.4	48	adult	F	yes		not shared
14	10:46:00	inactive	medium	pyle	no	32.4	35.7	31.8	35.4	38	juvenile	unk f	yes		not shared
238	10:55:00	inactive	medium	pyle	no	30.4	30.7	31.5	32.1	55	adult	M	yes		not shared
239	11:05:00	inactive	small	1	no	28.8	31.7	29.4	29.9	40	juvenile	F	yes		not shared
15	11:06:00	inactive	small	pyle	no	28.2	31.3	31.2	35.4	55	adult	F	yes		not shared
16	11:13:00	inactive	small	pyle	no	35	38.2	32.7	37.3	40	juvenile	M	yes		not shared
242	11:22:00	inactive	medium	1	no	28.8	31.7	30.2	32.1	48	adult	F	yes		not shared
243	11:28:00	inactive	medium	pyle	no	27.3	28.7	30.8	29.7	50	adult	M	yes		not shared
244	11:40:00	inactive	medium	1	no	27.4	28.4	30.4	28.9	53	adult	M	yes		not shared
19	11:45:00	inactive	small	pyle	yes	43.5	43.4	33.2	34.9	34	juvenile	unk	yes		not shared
245	12:06:00	inactive	medium	1	no	32.4	36.1	31.4	36.5	43	juvenile	M	yes		not shared
246	12:11:00	inactive	medium	3	no	29.4	31.5	29.8	30.8	51	adult	M	yes		not shared
23	12:20:00	inactive	small	2	no	31.8	34	32	32.7	36	juvenile	M	yes		not shared
24	12:28:00	inactive	small	pyle	yes	33.2	37	32.6	38.4	33	juvenile	UNK	yes		not shared
25	12:34:00	inactive	small	pyle	no	33.7	34	33.2	33.7	49	adult	F	yes		not shared
249	12:34:00	inactive	medium	2	yes	32.7	36.8	32.8	36.2	29	juvenile	UNK	yes		not shared
250	12:40:00	inactive	medium	1	no	31.2	36.9	32.1	33.3	50	adult	F	yes		not shared
26	12:42:00	inactive	small	pyle	no	35.6	43.8	33	34.2	46	adult	M	yes		not shared
251	13:03:00	inactive	medium	1	no	34	40.6	34.3	34.4	54	adult	M	yes		not shared
252	13:08:00	inactive	medium	1	no	39.6	42.2	35.2	34.3	53	adult	F	yes		not shared
27	13:18:00	inactive	medium	pyle	no	38.2	43.3	35.4	35	52	adult	M	yes		not shared
28	13:28:00	inactive	small	pyle	no	43.8	43.7	34.1	42.7	40	juvenile	M	yes		not shared
255	13:34:00	inactive	small	pyle	no	33.4	37	33.4	32.6	33	juvenile	UNK	yes		not shared
29	13:35:00	inactive	small	pyle	no	37.4	43.4	34.6	41	42	juvenile	F	yes		not shared
256	13:41:00	inactive	medium	2	no	36.7	42.3	35.1	34.4	39	juvenile	UNK F	yes		not shared
30	13:50:00	inactive	small	pyle	no	39.9	43.9	35.8	44.6	38	juvenile	M	yes		not shared
31	13:55:00	inactive	medium	pyle	no	33.1	37.2	32.2	35.7	48	adult	F	yes		not shared	OVOS
32	14:08:00	inactive	small	pyle	no	39.5	38	33.7	35.8	40	juvenile	F	yes		not shared
257	14:17:00	inactive	medium	pyle	no	31.4	31.9	32.2	32.3	51	adult	F	yes		not shared
33	14:18:00	inactive	large	2	no	30.6	36.7	31.8	37.1	54	adult	F	yes		not shared	OVOS, nr foto errado, um menos
34	14:30:00	inactive	medium	3	no	33.6	39.9	32.1	36.3	50	adult	M	yes		not shared
260	14:39:00	inactive	large	3	no	34.7	39	33.4	35.7	44	juvenile	F	yes		not shared
261	14:47:00	inactive	large	pyle	yes	40.5	38.7	31	35.9	52	adult	F	yes		not shared
39	15:20:00	inactive	small	1	no	36.9	37.8	30.1	36.5	38	juvenile	unk	yes		not shared
43	15:40:00	inactive	small	1	no	35.9	38.1	30.2	40	36	juvenile	UNK	yes		not shared
110	15:40:00	inactive	medium	pyle	yes	33.7	37.9	30.4	36.2	41	juvenile	M	yes		not shared	recente muda de pele
111	15:45:00	inactive	medium	pyle	no	32.3	36.8	30.2	35.5	52	adult	M	yes		not shared
44	15:59:00	inactive	small	1	no	32.8	33.2	31.3	37.2	39	juvenile	UNK	yes		not shared
45	16:01:00	inactive	small	2	no	36.2	36.2	30.8	36.7	38	juvenile	UNK	yes		not shared
46	16:15:00	inactive	small	2	no	31.8	32.9	29.5	32.4	49	adult	M	yes		not shared
116	16:20:00	inactive	large	pyle	no	34.6	36	30.7	35.2	55	adult	F	yes		not shared
117	16:27:00	inactive	medium	pyle	no	37.7	40.7	30.2	37.4	50	adult	M	yes		not shared
118	16:35:00	inactive	medium	1	no	32.7	36.4	29.6	36	39	juvenile	UNK	yes		not shared
49	16:36:00	inactive	medium	2	no	32.6	34.9	28.7	31.7	45	adult	F	yes		not shared
50	16:46:00	inactive	small	1	no	35.1	35.9	28.7	34.9	44	juvenile	F	yes		not shared
119	16:47:00	inactive	large	pyle	yes	36.1	34	31.7	34.1	52	adult	F	yes		not shared
51	16:50:00	inactive	medium	pyle	no	30.6	32.1	28.1	30.8	59	adult	F	yes		not shared
120	17:08:00	inactive	small	1	no	32.8	35.1	28.8	35.7	38	juvenile	UNK F	no		not shared
121	17:14:00	inactive	medium	pyle	no	36.3	40.3	31.3	35.1	39	juvenile	M	no		not shared
122	17:21:00	inactive	large	pyle	no		41.2	29.9	38.8	29	juvenile	UNK	no		not shared
123	17:23:00	inactive	medium	pyle	no	39.8	40.8	30	39.2	33	juvenile	UNK	no		not shared
54	17:28:00	inactive	small	pyle	no	29.1	31.9	27.5	30.7	41	juvenile	M	yes		not shared
55	17:33:00	inactive	medium	1	no	35.2	34.8	26.6	31.1	44	juvenile	F	yes		not shared
56	17:38:00	inactive	medium	pyle	no	32.2	35.6	26.5	34.1	47	adult	M	yes		not shared
59	18:00:00	inactive	medium	pyle	no	30.6	31.7	26.1	30.8	36	juvenile	unk	yes		not shared
60	18:20:00	inactive	small	1	no	29.2	28.9	25.6	26.7	50	adult	M	yes		not shared
124	18:30:00	inactive	small	pyle	no	28.4	28.4	27	27.4	38	juvenile	UNK	yes		not shared
127	18:42:00	inactive	small	3	no	26.7	25.8	26.1	28.7	55	adult	M	yes		not shared
63	18:45:00	inactive	large	1	no	31.8	33.7	25.4	26.8	63	adult	F	yes		not shared
128	18:48:00	inactive	medium	1	no	30.2	30.8	24.5	25.8	54	adult	F	yes		not shared
64	18:57:00	inactive	small	pyle	no	27.9	26.8	25	26.8	51	adult	F	yes		not shared	fenda
131	19:02:00	inactive	medium	pyle	no	29.9	31.8	24.8	24.1	49	adult	M	yes		not shared
65	19:16:00	inactive	small	pyle	yes	27.2	25.6	24.9	25.6	38	juvenile	UNK	yes		not shared
66	19:23:00	inactive	medium	pyle	no	26.9	28.1	24.5	25.6	50	adult	M	yes		not shared
134	19:26:00	inactive	small	1	no	27.2	29.3	25.2	24.2	41	juvenile	M	yes		not shared
135	19:29:00	inactive	small	1	no	27.8	26.3	24.4	25.3	48	adult	M	yes		not shared
70	19:58:00	inactive	medium	1	no	27.3	25.4	24.1	28.2	54	adult	M	yes		not shared
71	20:21:00	inactive	medium	1	no	27.5	26.2	24.8	25	53	adult	F	yes		not shared	gafanhoto vomitado
72	20:26:00	inactive	medium	pyle	no	29.5	29.4	24.6	25.8	42	juvenile	F	yes		not shared
141	20:28:00	inactive	medium	pyle	no	27.2	27.2	23.8	24.8	36	juvenile	UNK	yes		not shared
73	20:42:00	inactive	small	pyle	no	27.3	25.9	24.7	25.4	50	adult	F	yes		not shared
74	20:50:00	inactive	small	pyle	no	30.3	28.4	24.8	26.1	50	adult	F	yes		not shared	entre rochas
77	21:21:00	inactive	medium	pyle	yes	26.9	27.2	23.8	26.2	43	juvenile	M	yes		not shared	inchaço
173	21:21:00	inactive	medium	1	no	30	31.9	26.3	30.8	45	adult	M	yes		not shared
79	21:39:00	inactive	small	2	yes	26.5	23.7	24.3	24.9		juvenile	UNK	yes		not shared
176	21:48:00	inactive	medium	4	no	27.6	26.6	25.9	27.8	49	adult	F	yes		not shared
178	22:19:00	inactive			no	29.4	27.3	26.2	27.3	39	juvenile	UNK	yes		not shared
179	22:49:00	inactive	small	pyle	no	28.8	26.9	25.6	27.8	42	juvenile	M	yes		not shared
86	23:15:00	inactive	medium	pyle	yes	27.4	26.8	24.1	24.4	48	adult	F	yes		not shared
88	23:28:00	inactive	small	pyle	no	25.7	24.9	24.4	24.7	54	adult	M	yes		not shared
67	19:33:00	active	medium	1	no		26.2	24.7	27.8	38		UNK	yes
68	19:37:00	active			yes	26.7		24.8	27.7	39		UNK	yes
69	19:49:00	active			no	25.2		24.1	24.5	56		F	yes
75	20:59:00	active			no	24.3		24.3	24.5	54		M	yes
76	21:11:00	active			yes	24.7		25.2	26.7	49		F	yes
78	21:26:00	active			no	24.6		23.6	25.2	33		UNK	yes
80	21:50:00	active			yes	23.3		24.3	23.5	52		F	yes
81	22:06:00	active			no	23.2		23.7	23.4	55		M	yes
82	22:18:00	active			no	24.3		23.9	22.5	42		F	yes
83	22:29:00	active	small	1	no	22.3		23.6	23.3	49		M	yes
87	23:23:00	active	large	pyle	yes	23.4		24.3	25.4	54		F	yes
89	23:38:00	active			no	23.2		24.1	24.5	36		UNK	yes
90	00:04:00	active			no	23.9		24.4	24.1	43		M	yes
91	00:13:00	active			yes	24.8		24.1	24.8	49		F	yes
92	00:21:00	active	small	3	no	24.8		23.3	24.2	58		M	yes
93	00:27:00	active			no	23.1		23.7	23.2	45		M	yes
94	00:31:00	active			no	23.7		23.7	24.6	46		F	yes
96	01:09:00	active			no	23.9		23.9	23.1	52		M	yes
97	01:17:00	active	small	pyle	no	23.9		23.5	23.7	42		F	yes
98	01:25:00	active	medium	1	no	26.6	26.3	23.4	25.6	54		F	yes
99	01:34:00	active	large	3	no	26.9	24.3	24.1	24.6	58		M	yes
100	02:06:00	active			no	24.4		24.4	23.8	54		M	yes
101	02:16:00	active	small	pyle	no	27.3	25	24.6	24.7	39		UNK	yes
102	02:33:00	active	medium	2	no	26.7	24.7	24.7	25.3	52		F	yes
103	02:45:00	active	large	pyle	no		27.3	25	26.3	51		F	yes
132	19:03:00	active			no	27.8		24.8	27.2	52		M	yes
133	19:20:00	active			no	25.2		24.5	25.1	50		F	yes
138	19:48:00	active			no	25.3		24.5	24.2	38		UNK	yes
139	19:55:00	active			no	24.9		24.3	25.2	40		F	yes
140	20:08:00	active			no	25.8		24.6	25.4	40		M	yes
142	20:35:00	active			yes	25.3		24.3	25.1	52		F	yes
143	20:48:00	active			no	25.8		23.8	23.7	43		M	yes
145	03:15:00	active			no	22.7		24.8	22.7	35		UNK	yes
146	03:22:00	active			no	23.6		24.4	23.5	36		UNK	yes
147	03:30:00	active			yes	23.7		25.5	23.9	50		M	yes
148	03:36:00	active			no	23.9		25.2	24.2	53		M	yes
149	04:08:00	active			yes	22.7		23.7	22.4	54		F	yes
150	04:24:00	active			no	24.1		23.5	24.2	37		UNK	yes
151	04:37:00	active			no	21.6		24.1	22.4	39		UNK M	yes
152	04:45:00	active			no	23.2		23	22.4	39		UNK	yes
153	05:03:00	active			no	23.3		24	21.4	35		UNK	yes
154	05:23:00	active			yes	21.4		23.8	23.1	46		M	yes
156	05:41:00	active			no	21.3		23.1	22.1	27		UNK	yes
174	21:30:00	active			no	27.8		25.9	26.8	58		M	yes
175	21:37:00	active	small	pyle	no	25.8		25.8	26.8	54		M	yes
177	21:55:00	active			no	27.4		20.6	26.9	49		F	yes
180	23:05:00	active			no	27.6		25.5	26.6	53		M	yes
181	23:36:00	active			no	26.2		25.1	25.7	47		M	yes
184	01:04:00	active			yes	25.4		26.1	25.4	52		M	yes
189	02:09:00	active	small	1	no	24.8		25	25.4	59		M	yes
190	02:20:00	active	medium	pyle	yes	24.3		26.1	26.7	54		F	yes
193	03:25:00	active			no	22.8		25.1	22.4	54		M	yes
194	03:32:00	active			no	23.3		24.9	23.4	52		M	yes
195	03:37:00	active			no	23.4		24.2	23.3	40		M	yes
196	03:45:00	active			no	23.3		23.5	23	45		F	yes
197	03:50:00	active	small	3	no		22.8	23.5	22.8	39		F	yes
198	03:58:00	active			no	22.2		23.3	22.2	47		M	yes
199	04:16:00	active			no	21.9		23.5	22	53		F	yes
200	04:24:00	active			no	22.3		23.5	22.3	36		UNK F	yes
201	04:42:00	active			no	22.2		23.5	22.2	43		M	yes
202	05:12:00	active			no	21.7		23.1	21.9	58		M	yes
203	05:18:00	active			no	22.2		22.6	22.2	51		F	yes
204	05:20:00	active			no	22.5		22.9	22.8	37		UNK F	yes
205	05:26:00	active			no	22.7		22.9	22.9	49		F	yes
206	05:34:00	active			no	22		22.8	22.4	42		F	yes
207	05:46:00	active			no	22.2		23	22.3	48		F	yes
208	06:12:00	active			no	22.3		23.3	22.1	54		F	yes			rocha mt fina
